# Supplementary material for: Modular calibrant sets for the structural analysis of nucleic acids by ion mobility spectrometry mass spectrometry
Source: Royal Society of Chemistry journal article supplement (doi:10.1039/c6an00453a), 2016-01-01
Supplement: c6an00453a1.pdf [file c6an00453a1.pdf]

## Modular calibrant sets for the structural analysis of nucleic acids by ion mobility spectrometry mass spectrometry

Jennifer L. Lippens, Srivathsan Ranganathan, Rebecca J. D'Esposito, and Daniele Fabris

### Supporting Material

**Table 1S.** Name, sequence, and mass of single-stranded (ss) and double-stranded (ds) species employed to generate calibration sets. Species marked with  $\blacklozenge$  were used exclusively as ss calibrants, whereas those marked with \* were combined with the respective complementary strand (not shown) to form a duplex construct of corresponding length. Average masses are reported.

| Name                   | Sequence (5' → 3')                                                                               | ss mass (u) | ds mass (u) |
|------------------------|--------------------------------------------------------------------------------------------------|-------------|-------------|
| 6mer $\blacklozenge$ * | CCCGGG                                                                                           | 1793.4      | 3586.4      |
| 14b $\blacklozenge$ *  | GTTAAGTCGTATTA                                                                                   | 4292.9      | 8523.7      |
| 18b*                   | AAGAAGGTAACGAGTAGG                                                                               | 5645.7      | 10997.2     |
| 22b*                   | TCAGAAGAAGGTAACGAGTAGG                                                                           | 6881.5      | 13468.8     |
| 24b $\blacklozenge$ *  | TATCAGAAGAAGGTAACGAGTAGG                                                                         | 7498.9      | 14703.6     |
| 32b $\blacklozenge$ *  | TTAAACAGTATCAGAAGAAGGTAACGAGTAGG                                                                 | 9978.6      | 19644.9     |
| 48b $\blacklozenge$ *  | TTAAACAGTAGGAAGAAAGAGGGAAGTTATAATAATGTAACGAGTAGG                                                 | 15117.9     | 29531.3     |
| 64b $\blacklozenge$ *  | TTAAACAGGAGAACACAATTCAGATAGGAAGAAAGAGGGAAGTCAGAAGAAGGTAACGAGTAGG                                 | 20087.1     | 39415.6     |
| 80b $\blacklozenge$    | TTAAACAGGAGAACACAATTATAGTAAGACCACAGGCAGATAGGAAGAAAGAGGGAAGTCAGAAAGGTAACGAGTAGG                   | 25072.4     | N/A         |
| 96b $\blacklozenge$    | TTAAACAGGAGAACACAATTATAGTAAGACCACAGGCAGATAGGAAGAAAGAGGGAAGTCAGAAATCAAACATGAAGTAGGAAGGTAACGAGTAGG | 30056.6     | N/A         |

**Table 2S.** Comparison of CCS values obtained from the EHSS and TJM algorithms for five ds constructs in the study. Each value is the average and relative standard deviation (RSD%) obtained from 20 configurations along the simulation trajectory. A relative deviation ( $\Delta\%$ ) was calculated between corresponding EHSS and TJM values. An average RMSD of  $\pm 3.9\%$  was calculated from the various  $\Delta\%$ , which decreased to  $\pm 0.7\%$  upon exclusion of the 14a:b species. Uncertainty regarding the conformation of this species in the gas phase may be the source of its high  $\Delta\%$  (see *Results and Discussion*).

| Duplex              | z | CCS <sub>EHSS</sub> ( $\text{\AA}^2$ ) $\pm$ RSD% | CCS <sub>TJM</sub> ( $\text{\AA}^2$ ) $\pm$ RSD% | $\Delta\%$ | RMSD                          |
|---------------------|---|---------------------------------------------------|--------------------------------------------------|------------|-------------------------------|
| (6mer) <sub>2</sub> | 3 | 496.9 $\pm$ 1.0%                                  | 491.3 $\pm$ 1.0%                                 | -1.1%      |                               |
| 10a:b               | 5 | 775.8 $\pm$ 1.9%                                  | 767.7 $\pm$ 1.7%                                 | -1.1%      |                               |
| 14a:b               | 5 | 967.0 $\pm$ 1.4%                                  | 1162.5 $\pm$ 1.3%                                | +16.8%     | <b><math>\pm 3.9\%</math></b> |
| 18a:b               | 6 | 1405.1 $\pm$ 0.8%                                 | 1398.8 $\pm$ 1.3%                                | -0.4%      |                               |
| 22a:b               | 7 | 1791.8 $\pm$ 0.6%                                 | 1790.2 $\pm$ 0.9%                                | -0.1%      |                               |

**Table 3S.** Comparison of CCS values obtained by the EHSS method in either He or N<sub>2</sub> (EHSS<sub>He</sub> and EHSS<sub>N<sub>2</sub></sub>, respectively) for the calibrant sets in this study. An average RMSD of  $\pm 3.4\%$  was obtained from corresponding values, which indicated a negligible difference between the two datasets. The fact that the ss series displayed a larger RMSD than the ds counterpart (i.e.,  $\pm 4.9\%$  versus  $\pm 1.5\%$ ) could be explained by intrinsic errors associated with modeling structures devoid of well-defined secondary structure.

| Species             | z  | CCS EHSS <sub>He</sub> (Å <sup>2</sup> ) $\pm$ RSD% | CCS EHSS <sub>N<sub>2</sub></sub> (Å <sup>2</sup> ) $\pm$ RSD% | $\Delta\%$ | RMSD        |
|---------------------|----|-----------------------------------------------------|----------------------------------------------------------------|------------|-------------|
| 6mer                | 3  | 321.6 $\pm$ 1.1%                                    | 322.9 $\pm$ 1.1%                                               | -0.4%      |             |
| 14b                 | 4  | 685.2 $\pm$ 1.9%                                    | 743.7 $\pm$ 5.7%                                               | -7.9%      |             |
| 24b                 | 4  | 991.5 $\pm$ 1.6%                                    | 992.1 $\pm$ 1.9%                                               | -0.1%      |             |
|                     | 5  | 1127.1 $\pm$ 1.0%                                   | 1000.6 $\pm$ 0.9%                                              | +12.6%     |             |
| 32b                 | 5  | 1221.3 $\pm$ 1.8%                                   | 1217.8 $\pm$ 1.6%                                              | +0.3%      | $\pm 4.9\%$ |
|                     | 6  | 1411.5 $\pm$ 1.2%                                   | 1367.9 $\pm$ 0.5%                                              | +3.2%      |             |
| 48b                 | 7  | 1919.4 $\pm$ 0.5%                                   | 1869.7 $\pm$ 1.3%                                              | +2.7%      |             |
| 64b                 | 8  | 2528.1 $\pm$ 1.1%                                   | 2507.9 $\pm$ 0.6%                                              | +0.8%      |             |
| 80b                 | 9  | 2865.0 $\pm$ 0.6%                                   | 2868.3 $\pm$ 0.6%                                              | -0.1%      |             |
| 96b                 | 10 | 3524.2 $\pm$ 0.7%                                   | 3505.1 $\pm$ 0.6%                                              | +0.5%      |             |
| (6mer) <sub>2</sub> | 3  | 497.2 $\pm$ 1.0%                                    | 496.9 $\pm$ 1.0%                                               | +0.1%      |             |
| 14a:b               | 5  | 913.7 $\pm$ 0.9%                                    | 967.0 $\pm$ 1.4%                                               | -5.5%      |             |
| 18a:b               | 6  | 1402.7 $\pm$ 0.7%                                   | 1405.1 $\pm$ 0.8%                                              | -0.2%      |             |
| 22a:b               | 7  | 1796.5 $\pm$ 0.7%                                   | 1791.8 $\pm$ 0.6%                                              | +0.3%      |             |
|                     | 8  | 1750.6 $\pm$ 1.7%                                   | 1746.5 $\pm$ 1.4%                                              | +0.2%      |             |
| 24a:b               | 7  | 1872.4 $\pm$ 0.8%                                   | 1868.4 $\pm$ 0.5%                                              | +0.2%      |             |
| 32a:b               | 8  | 2445.1 $\pm$ 1.1%                                   | 2446.2 $\pm$ 1.0%                                              | <0.1%      | $\pm 1.5\%$ |
|                     | 9  | 2430.1 $\pm$ 0.4%                                   | 2432.5 $\pm$ 0.4%                                              | -0.1%      |             |
| 48a:b               | 10 | 3625.4 $\pm$ 0.3%                                   | 3623.7 $\pm$ 0.4%                                              | <0.1%      |             |
|                     | 11 | 3660.6 $\pm$ 0.5%                                   | 3668.8 $\pm$ 0.4%                                              | -0.2%      |             |
| 64a:b               | 12 | 4651.0 $\pm$ 0.5%                                   | 4654.8 $\pm$ 0.7%                                              | -0.1%      |             |
|                     | 13 | 4804.2 $\pm$ 0.7%                                   | 4810.8 $\pm$ 0.7%                                              | -0.1%      |             |
|                     | 14 | 4909.4 $\pm$ 0.4%                                   | 4908.0 $\pm$ 0.7%                                              | <0.1%      |             |

**Table 4S.** Comparison of EHSS CCS values obtained in this study and reported in previous publications. The individual  $\Delta\%$  values were greater for the larger ds construct and the unconstrained ss species, which again point towards possible deficiencies in their gas-phase models.

| Species       | z  | CCS <sub>EHSS</sub> ( $\text{\AA}^2$ ) $\pm$ RSD% | Literature CCS ( $\text{\AA}^2$ ) | $\Delta\%$ | RMSD       |
|---------------|----|---------------------------------------------------|-----------------------------------|------------|------------|
| gc14 (dsDNA)  | 7  | 1049.5 $\pm$ 0.7%                                 | 1016                              | +3.3%      |            |
| gc18 (dsDNA)  | 9  | 1245.8 $\pm$ 0.5%                                 | 1254                              | -0.7%      |            |
| mix26 (dsDNA) | 13 | 2145.0 $\pm$ 0.9%                                 | 2035                              | +5.4%      | $\pm$ 4.5% |
| 10dT (ssDNA)  | 3  | 486.1 $\pm$ 2.2%                                  | 452                               | +7.5%      |            |
| 16nt hairpin  | 4  | 630.0 $\pm$ 0.4%                                  | 620                               | +1.6%      |            |

**Table 5S.** Name, sequence, and mass of test samples employed to evaluate the various calibration curves. Species marked with \* were combined with the respective complementary strand (not shown) to form a duplex construct of corresponding length. Species marked with  $\blacklozenge$  were used exclusively as ss samples. Average masses are reported.

| Name                 | Sequence (5' $\rightarrow$ 3')                                         | ss mass (u) | ds mass (u) |
|----------------------|------------------------------------------------------------------------|-------------|-------------|
| 10b*                 | CGCGCGCGCG                                                             | N/A         | 6060.0      |
| 16b $\blacklozenge$  | GAAGGTAACGAGTAGG                                                       | 5019.3      | N/A         |
| 30a* $\blacklozenge$ | GTATTCCGTAGTTCAAATTGCATACTGGAG                                         | 9326.0      | 18472.0     |
| 36a*                 | CCTACTCGTTACCTTCTTCTGACTTCCCTCTTTCTT                                   | N/A         | 21572.0     |
| 56a* $\blacklozenge$ | GAGAACACAATTCAGATAGGAAGAAAGAGGGAAGTCAGAAGAAGGTAACGAGTAGG               | 16866.9     | 33733.8     |
| 70b $\blacklozenge$  | TTAAACAGGAGAACACAATTATAGTAAGACCACAGGCAGATAGGAAGAAAGAGGGAAGTCAGAAGAAGGT | 21909.3     | N/A         |
| 16hp                 | TGCGATACTCATCGCA                                                       | 4841.2      |             |
| 28hp                 | GCGTTCATCAGAGTCATCTGATGAACGC                                           | 8588.6      |             |
| 36hp                 | GCTATCCAAGTCTTGCTCGAGCAAGACTTGGATAGC                                   | 11060.2     | N/A         |
| 48hp                 | GGTCTCTGGTTAGCCAGAGAGCTGACTCTCTGGCTAACTAGAGAACC                        | 14783.6     |             |

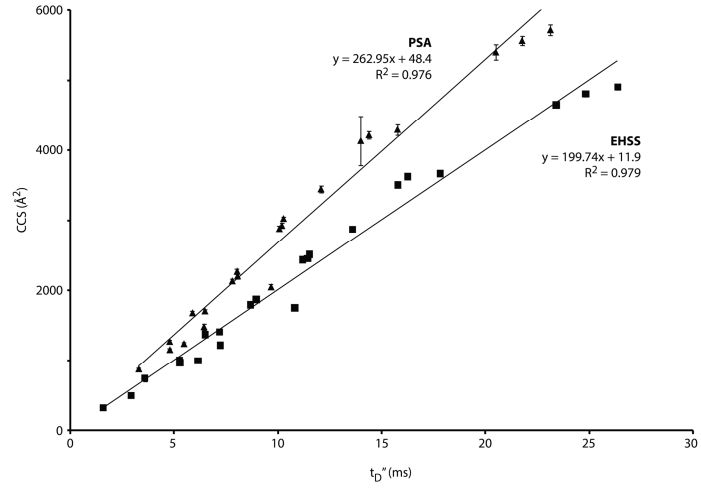

**Figure 1S.** Calibration curves obtained by including all detected charge states. The curves correlate experimental  $t_D''$  data with the corresponding reference values provided by either the EHSS (■) or PSA (◆) algorithm.
